# Supplementary material for: Environmentally friendly nanoflower Al2O3@carbon spheres as adsorbent for dispersive solid-phase microextraction of copper and lead in food and water samples
Source: Royal Society of Chemistry journal article supplement (doi:10.1039/d3ay01579c), 2023-01-01
Supplement: d3ay01579c1.pdf [file d3ay01579c1.pdf]

## Environmentally friendly nanoflower Al<sub>2</sub>O<sub>3</sub>@carbon spheres as adsorbent for dispersive solid phase micro-extraction of copper and lead in food and water samples

Şerife Tokalıoğlu<sup>a,\*</sup>, Melike Selenay Demirişler<sup>a</sup>, Halil Şahan<sup>b</sup>, Şaban Patat<sup>a</sup>

<sup>a</sup>Erciyes University, Faculty of Sciences, Chemistry Department, 38039, Kayseri, Türkiye

<sup>b</sup>Department of Basic Sciences of Engineering, Kayseri University, 38280, Kayseri, Türkiye

**Table S1** Effect of elution conditions

| Eluent concentration and type          | Volume (mL) | Cu                  | Pb     |
|----------------------------------------|-------------|---------------------|--------|
| 1 mol L <sup>-1</sup> HCl              | 3           | <sup>a</sup> 90 ± 3 | 79 ± 4 |
| 1 mol L <sup>-1</sup> HCl              | 5           | 99 ± 3              | 98 ± 4 |
| 2 mol L <sup>-1</sup> HCl              | 2           | 97 ± 2              | 96 ± 3 |
| 2 mol L <sup>-1</sup> HCl              | 3           | 95 ± 2              | 97 ± 4 |
| 2 mol L <sup>-1</sup> HCl              | 4           | 94 ± 0              | 96 ± 4 |
| 2 mol L <sup>-1</sup> HCl              | 5           | 94 ± 2              | 95 ± 0 |
| 1 mol L <sup>-1</sup> HNO <sub>3</sub> | 5           | 64 ± 5              | 70 ± 4 |
| 2 mol L <sup>-1</sup> HNO <sub>3</sub> | 3           | 95 ± 2              | 82 ± 4 |
| 2 mol L <sup>-1</sup> HNO <sub>3</sub> | 5           | 93 ± 0              | 95 ± 4 |

<sup>a</sup>  $\bar{x} \pm SD$ , n = 3.
